# Supplementary material
Source: Elsevier journal article supplement (https://lshtm-eprints-repo-prod.lshtm-eprints.cdl.cosector.com/28100/1/mmc1.pdf)
Supplement: mmc1 [file mmc1.pdf]

# THE LANCET **Oncology**

## **Supplementary appendix**

This appendix formed part of the original submission and has been peer reviewed. We post it as supplied by the authors.

Supplement to: Ahmed HU, Hindley RG, Dickinson L, et al. Focal therapy for localised unifocal and multifocal prostate cancer: a prospective development study. *Lancet Oncol* 2012; published online April 17. DOI:10.1016/S1470-2045(12)70121-3.

## Focal Therapy for Localised Unifocal and Multifocal Prostate cancer: a prospective development study

**Supplementary Table.** Baseline characteristics in 41 men undergoing focal high intensity focused ultrasound in men with unifocal and multifocal localised prostate cancer: sub-group demographics according to ablation type.

| Baseline characteristics | Type of ablation                    |                                     |                                  |
|--------------------------|-------------------------------------|-------------------------------------|----------------------------------|
|                          | Unilateral, one area<br>(Figure 1a) | Bilateral, two areas<br>(Figure 1b) | Midline, one area<br>(Figure 1c) |
| N                        | 20/41 (49%)                         | 15/41 (37%)                         | 6/41 (15%)                       |
| Age (years) *            | 63 (58.0 – 68.0)                    | 60 (57.0 – 66.0)                    | 63 (62.8 – 66.8)                 |
| Serum PSA (ng/ml) *      | 6.6 (5.1 – 9.2)                     | 6.6 (6.0 – 7.4)                     | 6.1 (5.0 – 8.7)                  |
| Gleason (TPM biopsies)   |                                     |                                     |                                  |
| 3+3                      | 6/20 (30%)                          | 5/15 (33%)                          | 2/6 (33%)                        |
| 3+4                      | 10/20 (50%)                         | 10/15 (67%)                         | 4/6 (67%)                        |
| 4+3                      | 4 (20%)                             | 0 (0%)                              | 0 (0%)                           |
| Clinical Stage           |                                     |                                     |                                  |
| T1c                      | 19/20 (95%)                         | 12/15 (80%)                         | 6/6 (100%)                       |
| T2a                      | 1/20 (5%)                           | 3/15 (20%)                          | 0 (0%)                           |
| NCCN risk category       |                                     |                                     |                                  |
| Low                      | 5/20 (25%)                          | 5/15 (33%)                          | 1/6 (17%)                        |
| Intermediate             | 11/20 (55%)                         | 10/15 (67%)                         | 5/6 (83%)                        |
| High                     | 4/20 (20%)                          | 0 (0%)                              | 0 (0%)                           |

\* median (interquartile range)
